# Supplementary material
Source: Springer Nature journal article supplement (https://www.springermedizin.de/resource/supplementary/12936_2007_389_MOESM7_ESM.pdf/9547700)

### Pyn chl091

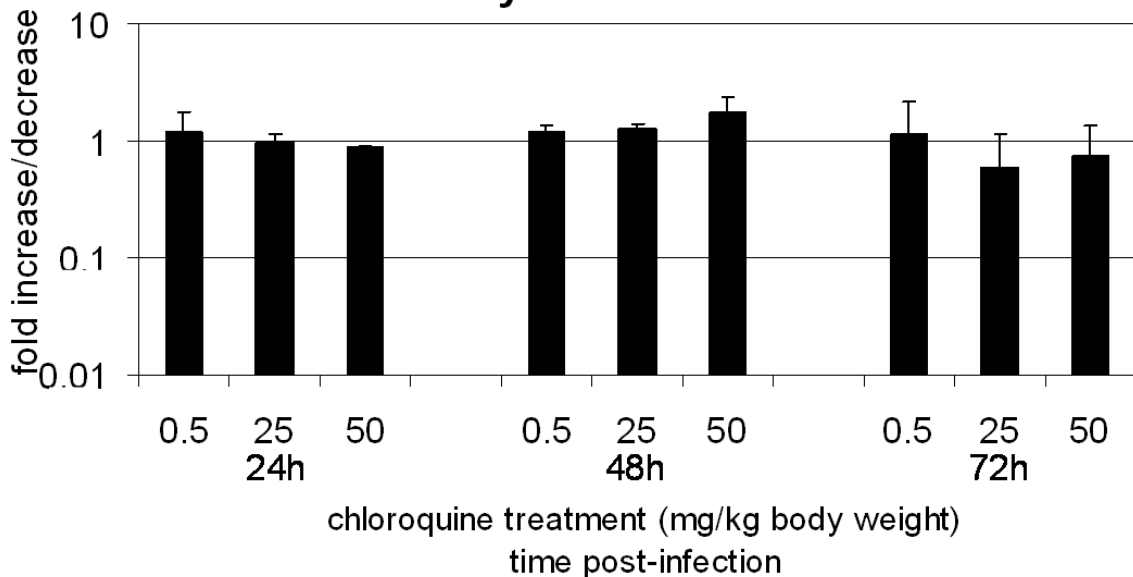

### Pyn chl055

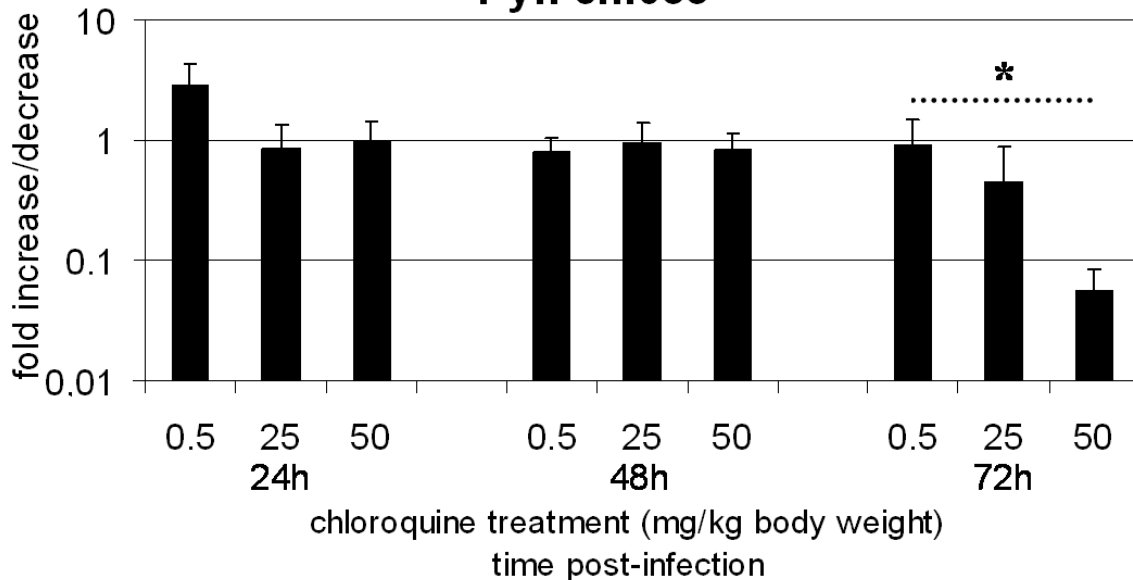

Supplement: MOESM7 [file 9547700]
